# Supplementary material for: Systematic identification and validation of the reference genes from 60 RNA-Seq libraries in the scallop Mizuhopecten yessoensis
Source: PubMed Central journal article supplement (PMC6460854; doi:10.1186/s12864-019-5661-x), 2019-04-11

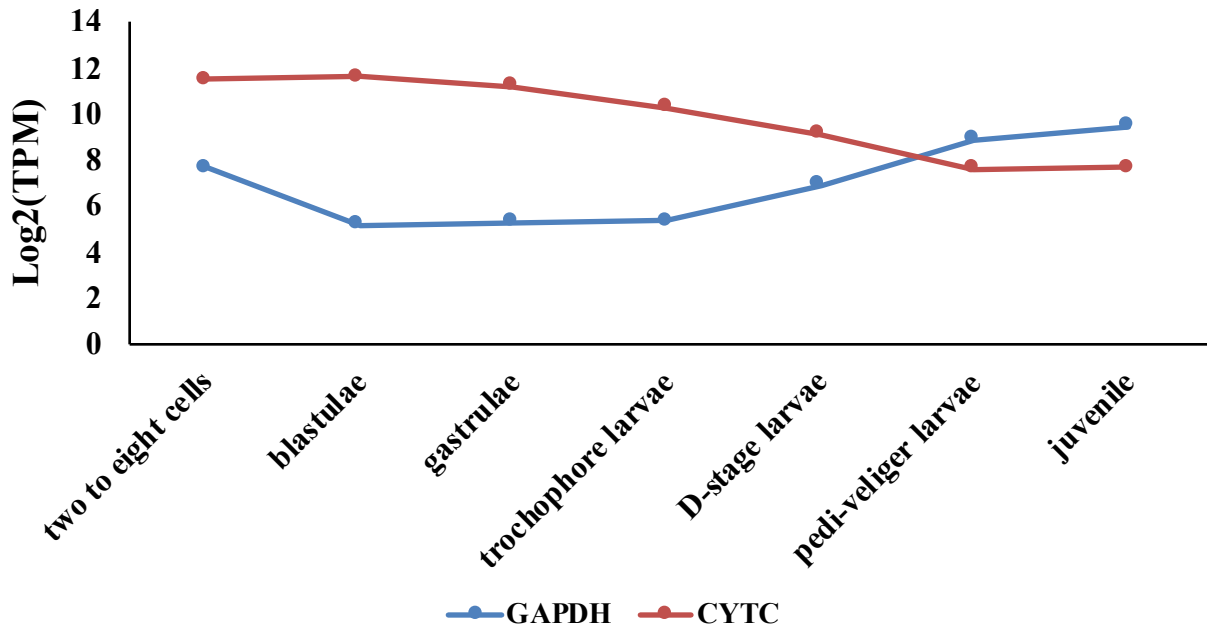

Supplement: 12864_2019_5661_MOESM3_ESM.pdf [file 12864_2019_5661_MOESM3_ESM.pdf]
